# Supplementary material
Source: Research Square preprint supplement (doi:10.21203/rs.3.rs-9424412/v1)
Supplement: Supplementary file 1 [file 187d5145434f32718bca9984.docx]

|  | **Gene** | **cDNA change** | **Protein variant** | **ACMG Classification** |
| --- | --- | --- | --- | --- |
| 1 | PKD1 | c.12008dupA | p.Gln4005AlafsTer152 | P |
| 2 | PKD1 | c.11639_11683del | p.Ala3880_Ala3894del | LP |
| 3 | PKD1 | c.10807G>C | p.Glu3603Gln | LP |
| 4 | PKD1 | c.5609A>G | p.Asn1870Ser | LP |
| 5 | PKD1 | c.12058C>T | p.Arg4021Ter | P |
| 6 | PKD1 | c.11705_11708delCCTC | p.Thr3902ArgfsTer41 | LP |
| 7 | PKD1 | c.8698C>T | p.Gln2900Ter | P |
| 8 | PKD1 | c.12008dupA | p.Gln4004AlafsTer152 | P |
| 9 | PKD1 | c.7984C>T | p.Gln2662Ter | LP |
| 10 | PKD1 | c.12058C>T | p.Arg4020Ter | P |
| 11 | PKD1 | c.12908A>T | p.4303LeuextTer35 | LP |
| 12 | PKD1 | c.3295+2T>C | - | P |
| 13 | PKD1 | c.8279T>G | p.Met2760Arg | LP |
| 14 | PKD1 | c.2180T>C | p.Leu727Pro | LP |
| 15 | PKD1 | c.11639_11683del | p.Ala3880_Ala3894del | LP |
| 16 | PKD1 | c.3745delG | p.Asp1249ThrfsTer24 | P |
| 17 | PKD1 | c.11438_11439delAT | p.Tyr3813Ter | LP |
| 18 | PKD1 | c.8311G>A | p.GlU2777 Lys | P |
| 19 | PKD1 | c.11881C>T | p.Gln3961Ter | P |
| 20 | PKD1 | c.8311G>A | p.Glu27771 Lys | P |
| 21 | PKD1 | c.5869_5870dupAG | p.Ser1957ArgfsTer16 | LP |
| 22 | PKD1 | c.3398_3399delTG | p.Val1133GlufsTer2 | LP |
| 23 | PKD1 | c.8279T>G | p.Met2760Arg | LP |
| 24 | PKD1 | c.8238delG | p.Met2747TrpfsTer9 | LP |
| 25 | PKD1 | c.4951C>T | p.Gln1651Ter | P |
| 26 | PKD1 | c.359+2T>G | - | P |
| 27 | PKD1 | c.2534T>C | p.Leu845Ser | P |
| 28 | PKD1 | c.1198C>T | p.Arg400Ter | P |
| 29 | PKD1 | c.9412G>A | p.Val3138Met | LP |
| 30 | PKD1 | c.11568C>G | p.Tyr3856Ter | P |
| 31 | PKD1 | c.9404C>T | p.Thr3135Met | LP |
| 32 | PKD1 | c.8311G>A | p.Glu2771Lys | P |
| 33 | PKD1 | c.3706C>T | p.Gln1236Ter | P |
| 34 | PKD1 | c.11571C>G | p.Tyr3857Ter | P |
| 35 | PKD1 | c.10217+2T>G | - | P |
| 36 | PKD1 | c.10591C>T | p.Gln3531Ter | P |
| 37 | PKD1 | c.2180T>C | p.Leu727Pro | LP |
| 38 | PKD1 | c.11534G>T | p.Arg3845Met | P |
| 39 | PKD1 | c.2189C>T | p.Ser730Leu | LB |
| 40 | PKD1 | c.7864_7899del | p.Tyr2622_Lys2633del | p |
| 41 | PKD1 | c.10459C>T | p.Gln3487Ter | P |
| 42 | PKD1 | c.8162-1G>A | - | P |
| 43 | PKD1 | c.8311G>A | p.Glu2771Lys | P |
| 44 | PKD1 | c.4888C>T | p.Gln1630Ter | P |
| 45 | PKD1 | c.3955G>A | p.Gly1319Arg | P |
| 46 | PKD1 | c.5154_5163dupGGGGTGGCTG | p.Met1722GlyfsTer52 | P |
| 47 | PKD1 | c.4888C>T | p.Gln1630Ter | P |
| 48 | PKD1 | c.7597_7598delTC | p.Ser2533GlnfsTer61 | P |
| 49 | PKD1 | c.11967_11974dup | p.Ser3992TrpfsTer49 | P |
| 50 | PKD1 | c.8371_8372dupCG | p.Ser2792GlyfsTer84 | P |
| 51 | PKD1 | c.8935_8937delTTC | p.Phe2979del | P |
| 52 | PKD1 | c.2215dupC | p.Gln739ProfsTer59 | LP |
| 53 | PKD1 | c.3706C>T | p.Gln1236Ter | P |
| 54 | PKD1 | c.12058C>T | p.Arg4021Ter | P |
| 55 | PKD1 | c.5014_5015delAG | p.Arg1672GlyfsTer98 | P |
| 56 | PKD1 | c.4951C>T | p.Gln1651Ter | P |
| 57 | PKD1 | c.8279T>G | p.Met2760Arg | LP |
| 58 | PKD1 | c.1273_1275delGAG | - | LP |
| 59 | PKD1 | c.8279T>G | p.Met2760Arg | LP |
| 60 | PKD1 | c.4951C>T | p.Gln1651Ter | P |
| 61 | PKD1 | c.10722G>A | p.Trp3574Ter | P |
| 62 | PKD1 | c.11646_11659del | p.Ser3883CysfsTer72 | P |
| 63 | PKD1 | c.11560_11561del | p.Thr3854AlafsTer105 | P |
| 64 | PKD1 | c.7416_7417insC | p.Gly2473ArgfsTer28 | LP |
| 65 | PKD1 | c.5607dupC | p.Asn1870GlnfsTer120 | P |
| 66 | PKD1 | c.2085delC | p.Ala696ArgfsTer89 | P |
| 67 | PKD1 | c.8279T>G | p.Met2760Arg | LP |
| 68 | PKD1 | c.5154_5163dupGGGGTGGCTG | p.Met1722GlyfsTer52 | P |
| 69 | PKD1 | c.11646_11659delCAGCGTCCGCCCCT | p.Ser3883CysfsTer72 | P |
| 70 | PKD1 | c.1105_1106delAG | p.Ser369Ter | P |
| 71 | PKD1 | c.10420C>T | p.Gln3474Ter | P |
| 72 | PKD1 | c.10420C>T | p.Gln3474Ter | P |
| 73 | PKD1 | c.3520_3527delCAGCCGGC | p.Gln1174Cysfs34Ter | LP |
| 74 | PKD1 | c.3802C>T | p.Gln1268Ter | LP |
| 75 | PKD1 | c.4835C>T | p.Thr1612Met | LP |
| 76 | PKD1 | c.6199C>T | p.Gln2067Ter | P |
| 77 | PKD1 | c.9425_9426insA | p.Tyr3143ValfsTer36 | P |
| 78 | PKD1 | c.8279T>G | p.Met2760Arg | LP |
| 79 | PKD1 | c.10973_10987delAAGAAGCCCGCAAGG | [p.Glu3658_Lys3662del](https://ceinge-fort.alissa.agilent.com/interpret/search_domains.html?type=variantPDot&query=NM_000296.4%3Ap.E3658_K3662del&genomeBuildRoot=any&domainType=GERMLINE) | LP |
| 80 | PKD1 | c.3349C>T | p.Gln1117Ter | P |
| 81 | PKD1 | c.1987C>T | p.Gln663Ter | P |
| 82 | PKD1 | c.11267-1G>T | - | p |
| 83 | PKD1 | c.6916-9G>A | - | LP |
| 84 | PKD1 | c.3745delG | p.Asp1249ThrfsTer24 | P |
| 85 | PKD1 | c.9771_9774delCTTT | p.Phe3257LeufsTer58 | P |
| 86 | PKD1 | c.3706C>T | p.Gln1236Ter | P |
| 87 | BA | c.5176C>T | p.Arg1726Trp | LP |
| 88 | PKD1 | c.3295+2T>C | - | P |
| 89 | PKD1 | c.2711_2712delAG | p.Glu904GlyfsTer196 | LP |
| 90 | PKD1 | c.12058C>T | p.Arg4021Ter | P |
| 91 | PKD1 | c.12058C>T | p.Arg4021Ter | P |
| 92 | PKD1 | c.3067C>T | p.Gln1023Ter | P |
| 93 | PKD1 | c.427C>T | p.Gln143Ter | LP |
| 94 | PKD1 | MLPA del upPKD1 | - | P |
| 95 | PKD1 | c.5869_5870dupAG | p.Ser1957ArgfsTer16 | LP |
| 96 | PKD1 | c.8311G>A | p.Glu2771Lys | P/LP |
| 97 | PKD1 | c.11881C>T | p.Gln3962Ter | P |
| 98 | PKD1 | c.9568G>C | p.Gly3190Arg | P |
| 99 | PKD1 | c.11357_11361dupGTCCT | p.His3788ValfsTer39 | LP |
| 100 | PKD1 | c.1529G>C | c.1529G>C | LP |
| 101 | PKD1 | c.10549G>T | p.Glu3517Ter | LP |
| 102 | PKD1 | c.8279T>A | p.Met2760Lys | LP |
| 103 | PKD1 | c.8162-1G>A | - | P |
| 104 | PKD1 | c.8284_8295delATCCTCATGCGC | p.Ile2762_Arg2765del | LP |
| 105 | PKD1 | c.6560G>A | p.Trp2187Ter | P |
| 106 | PKD1 | c.3398_3399delTG | p.Val1133GlufsTer2 | P |
| 107 | PKD1 | c.4835C>T | p.Thr1612Met | LP |
| 108 | PKD1 | c.11766G>A | p.Trp3922Ter | P |
| 109 | PKD1 | c.6916-9G>A | - | LP |
| 110 | PKD1 | c.3202C>T | p.Gln1068Ter | P |
| 111 | PKD1 | c.271_272delTC | p.Ser91GlyfsTer22 | P |
| 112 | PKD1 | c.2028dupC | p.Gly677ArgfsTer37 | LP |
| 113 | PKD1 | c.6916-9G>A | - | LP |
| 114 | PKD1 | c.8279T>A | p.Met2760Lys | LP |
| 115 | PKD1 | c.12010C>T | p.Gln4004Ter | P |
| 116 | PKD1 | c.9676A>G | p.Asn3226Asp | V |
| 117 | PKD1 | c.5014_5015delAG | p.Arg1672GlyfsTer98 | P |
| 118 | PKD1 | c.6050C>T | p.Ser2017Leu | P |
| 119 | PKD1 | c.3295+2T>C | - | LP/P |
| 120 | PKD1 | c.10549G>T | p.Glu3517Ter | LP |
| 121 | PKD1 | c.10549G>T | p.Glu3517Ter | LP |
| 122 | PKD1 | c.5905G>T | p.Glu1969Ter | P |
| 123 | PKD1 | c.9562A>G | p.Asn3188Asp | LP |
| 124 | PKD1 | c.6504C>G | p.Tyr2168Ter | P |
| 125 | PKD1 | c.10894_10895del | p.Ser3632ProfsTer88 | P |
| 126 | PKD1 | c.5884C>T | p.Gln1962Ter | P |
| 127 | PKD1 | c.9564_9566delCAA | p.Asn3188del | LP |
| 128 | PKD1 | c.11267-1G>T | - | P |
| 129 | PKD1 | c.1141G>A | p.Gly381Ser | P |
| 130 | PKD1 | c.10722G>A | p.Trp3574Ter | P |
| 131 | PKD1 | c.3514C>T | p.Gln1172Ter | P |
| 132 | PKD1 | c.10026delT | p.Leu3343SerfsTer54 | P |
| 133 | PKD1 | c.680_681insT | p.Gln227HisfsTer34 | LP |
| 134 | PKD1 | c.4888C>T | p.Gln1630Ter | P |
| 135 | PKD1 | c.4888C>T | p.Gln1630Ter | P |
| 136 | PKD1 | c.2180T>C | p.Leu727Pro | LP |
| 137 | PKD1 | c.3706C>T | p.Gln1236Ter | P |
| 138 | PKD1 | c.3706C>T | p.Gln1236Ter | P |
| 139 | PKD1 | c.6916-9G>A | - | P |
| 140 | PKD1 | c.3514C>T | p.Gln1172Ter | P |
| 141 | PKD1 | c.10420C>T | p.Gln3474Ter | P |
| 142 | PKD1 | c.10549G>T | p.Glu3517Ter | LP |
| 143 | PKD1 | c.11254C>T | p.Arg3752Trp | P |
| 144 | PKD1 | c.5223dupG | p.Leu1742AlafsTer29 | LP |
| 145 | PKD2 | c.7215G>T | p.Trp2405Cys | LP |
| 146 | PKD1 | c.12008dupA | p.Gln4004AlafsTer152 | P |
| 147 | PKD1 | c.8310delC | p.Asn2770LysfsTer5 | LP |
| 148 | PKD1 | c.974A>G | p.Tyr325Cys | LP |
| 149 | PKD1 | c.6266delG | p.Arg2089LeufsTer27 | LP |
| 150 | PKD1 | c.862C>T | p.Gln288Ter | P |
| 151 | PKD1 | c.3181delG | p.Glu1061Serfs*43 | LP |
| 152 | PKD1 | c.8228C>G | p.Ser2743* | LP |
| 153 | PKD1 | c.4255G>T | p.Glu1419* | LP |
| 154 | PKD1 | c.8302G>A | p.Val2768Met | LP |
| 155 | PKD1 | c.8666_8674delGCTCCGCCA | p.Ser2889_Ala2891del | LP |
| 156 | PKD1 | c.6504C>G | p.Tyr2168Ter | P |
| 157 | PKD1 | c.12058C>T | p.Arg4021Ter | P |
| 158 | PKD1 | c.6586C>T | p.Gln2196Ter | P |
| 159 | PKD1 | c.6586C>T | p.Gln2196Ter | P |
| 160 | PKD1 | c.9035C>T | p.Thr3012Met | LP |
| 161 | PKD1 | c.8371_8372dup | p.Ser2792GlyfsTer84 | P |
| 162 | PKD1 | c.3295+2T>C | - | P |
| 163 | PKD1 | c.8681_8689delCCAACTCCG | p.Ala2894_Ser2896del | LP |
| 164 | PKD1 | c.7927C>G | p.Arg2643Gly | LP |
| 165 | PKD1 | c.4951C>T | p.Gln1651Ter | P |
| 166 | PKD1 | c.10348G>T | p.Glu3450* | P |
| 167 | PKD1 | c.7703+1G>T | - | P |
| 168 | PKD1 | c.9977G>A | p.Gly3326Asp | LP |
| 169 | PKD1 | c.9977G>A | p.Gly3326Asp | LP |
| 170 | PKD1 | c.3398_3399delTG | p.Val1133GlufsTer2 | LP |
| 171 | PKD1 | c.412C>T | c.6483dupG | P |
| 172 | PKD1 | c.7704-1G>T | - | LP |
| 173 | PKD1 | c.6483dupG | p.Arg2162AlafsTer13 | P |
| 174 | PKD1 | C.11446G>A | p.Gly381Arg | Lp |
| 175 | PKD1 | c.4459T>G | p.Phe148Val | LP |
| 176 | PKD1 | c.1910C>T | p.Ala637Val | LP |
| 177 | PKD1 | c.9106A>C | p.THR3036Pro | LP |
| 178 | PKD1 | c.9771_9774delCTTT | p.Phe3257LeufsTer58 | P |
| 179 | PKD1 | c.12048G>C | p.(Lys4016Asn) | LP |
| 180 | PKD1 | c.4951C>T | (p.Gln1651Ter) | P |
| 181 | PKD1 | c.1690_1691del | p.Asp564ArgfsTer22 | LP |
| 182 | PKD1 | c.1723-2A>G | - | P |
| 183 | PKD1 | c.8428G>T | p.Glu2010Ter | P |
| 184 | PKD1 | c.1849+2T>C | - | LP |
| 185 | PKD1 | c.12011dup | p.Gln4005AlafsTer152 | V/LP |
| 186 | PKD1 | c.8017-2_8017-1del | - | P/LP |
| 187 | PKD1 | c.9397G>C | p.Gly3133Arg | LP |
| 188 | PKD1 | c.10822-2A>G | - | LP |
| 189 | PKD1 | c.10822-2A>G | - | LP |
| 190 | PKD1 | c.11017-10C>A | - | P/LP |
| 191 | PKD1 | c.8017-2_8017-1del | - | P |
| 192 | PKD1 | c.3300del | p.Glu1100AspfsTer4 | LP |
| 193 | PKD1 | c.2534T>C | p.Leu845Ser | P/LP |
| 194 | PKD1 | c.12048C>T | p.Glu1207LysfsTer30 | V/LP |
| 195 | PKD1 | c.12048C>T | p.Glu1207LysfsTer30 | V/LP |
| 196 | PKD1 | c.11956dup | p.Ala3986Glyfs*171 | LP |
| 197 | PKD1 | c.12261_12264del | p.Cys4087Trpfs*110 | LP |
| 198 | PKD1 | c.7271c>t | p.Thr2424Met | LP |
| 199 | PKD1 | c.412C>T | p.Arg138Ter | P |
| 200 | PKD1 | c.12261_12264del | p.Cys4087Trpfs*110 | LP |
| 201 | PKD1 | c.4306C>T | p.Arg1436* | P |
| 202 | PKD1 | c.8311G>A | p.Glu2777 Lys | P |
| 203 | PKD1 | c.8311G>A | p.Glu2777 Lys | P |
| 204 | PKD1 | c.6493C>T | p.Gln2165* | P |
| 205 | PKD1 | c.3745delG | p.Asp1249Thrfs*24 | P |
| 206 | PKD1 | c.12509_12513dup | p.Ser4172Argfs*28 | LP |
| 207 | PKD1 | c.9148dup | p.Ala3050Glyfs*19 | LP |
| 208 | PKD1 | c.9148dup | p.Ala3050Glyfs*19 | LP |
| 209 | PKD1 | c.12011dup | p.Gln4005AlafsTer152 | LP |
| 210 | PKD1 | c.10796C>G | p.Ser3599Ter | LP |
| 211 | PKD1 | c.4269dup | p.Thr1424Hisfs*7 | LP |
| 212 | PKD1 | c.359+2T>G | - | LP |
| 213 | PKD1 | c.9448G>A | p.Gly3150Ser | LP |
| 214 | PKD1 | c.1141G>A | p.(Gly381Ser | LP |
| 215 | PKD1 | c.8311G>A | p.Glu2771Lys | P |
| 216 | PKD1 | c.73_74delinsT | p.Gly25Serfs*48 | P |
| 217 | PKD1 | c.11270-1G>A | - | P |
| 218 | PKD1 | c.6232C>T | p.Gln2078Ter | LP |
| 219 | PKD1 | c.3409dup | p.Val1137Glyfs*74 | LP |
| 220 | PKD1 | c.8371_8372dup | p.Ser2792Glyfs*84 | LP |
| 221 | PKD1 | c.5090T>G | p.Leu1697Arg | LP |
| 222 | PKD1 | c.11253G>C | p.Gln3751His | P |
| 223 | PKD1 | c.3706C>T | p.Gln1236Ter | P |
| 224 | PKD1 | c.3706C>T | p.Gln1236Ter | P |
| 225 | PKD1 | c.3706C>T | p.Gln1236Ter | P |
| 226 | PKD1 | c.5964_5965del | p.Arg1990GlufsTer59 | P |
| 227 | PKD1 | c.4099_4100del | p.Arg1367GlyfsTer63 | P |
| 228 | PKD1 | c.3349C>T | p.Gln1117* | P |
| 229 | PKD1 | c.3284dup | p.Tyr1095Ter | LP |
| 230 | PKD1 | c.3284dup | p.Tyr1095Ter | LP |
| 231 | PKD1 | c.11156+2T>C | - | LP |
| 232 | PKD1 | c.9454C>T | p.Arg3152Trp | LP |
| 233 | PKD1 | c.7215G>T | p.Trp2405Cys | LP |
| 234 | PKD1 | c.2028dup | p.(Gly677ArgfsTer37) | P |
| 235 | PKD1 | c.12509_12513dup | p.Ser4172ArgfsTer28 | LP |
| 236 | PKD1 | c.12008dupA | p.Gln4004AlafsTer152 | P |
| 237 | PKD1 | c.9412G>A | p.Val3138Met | LP |
| 238 | PKD1 | c.9412G>A | p.Val3138Met | LP |
| 239 | PKD1 | c.12008Dup | p.Gln4004Alafster152 | P |
| 240 | PKD1 | c.5014_5015del | p.Arg1672Glyfs*98 | P |
| 241 | PKD1 | c.10976_10990del | p.Glu3659_Lys3663del | LP |
| 242 | PKD1 | c.4888C>T | p.Gln1630* | P |
| 243 | PKD1 | c.4306C>T | p.Arg1436* | P |
| 244 | PKD1 | c.10072del | p.Thr3358Hisfs*39 | LP |
| 245 | PKD1 | c.8311G>A | p.Glu2771Lys | P |
| 246 | PKD1 | c.6070C>T | p.Arg2024Cys | LP |
| 247 | PKD1 | c.9829C>T | p.Arg3277Cys | P |
| 248 | PKD1 | c.3295+2T>C | - | LP |
| 249 | PKD1 | c.11141_11142insA | p.Phe3714LeufsTer8 | LP |
| 250 | PKD1 | c.11141_11142insA | p.Phe3714LeufsTer8 | LP |
| 251 | PKD1 | c.2955_2958del | p.Tyr986ArgfsTer10 | LP |
| 252 | PKD1 | c.3295+2T>C | - | LP |
| 253 | PKD1 | c.2959C>T | p.Gln987* | LP |
| 254 | PKD1 | c.8137G>T | p.Gly2713Ter | P |
| 255 | PKD1 | c.412C>T | p.Arg138Ter | P |
| 256 | PKD1 | MLPA dup PKD1 | - | P |
| 257 | PKD1 | MLPA del PKD1 | - | P |
| 258 | PKD1 | c.9901dup | p.Ala3301Glyfs*89 | LP |

|  | **Gene** | **c.DNA change** | **Protein variant** | **ACMG Classification** |
| --- | --- | --- | --- | --- |
| 1 | PKD2 | c.2670+5G>A | - | LP |
| 2 | PKD2 | c.2614 C>T | p.Arg872Ter | LP |
| 3 | PKD2 | c.2614 C>T | p.Arg872Ter | P |
| 4 | PKD2 | c.1094+3_1094+6delAAGT | - | P |
| 5 | PKD2 | c.1837C>T | p.Gln613Ter | P |
| 6 | PKD2 | c.261G>A | p.Trp87Ter | P |
| 7 | PKD2 | c.2419C>T | p.Arg807Ter | P |
| 8 | PKD2 | c.2614C>T | p.Arg872Ter | P |
| 9 | PKD2 | c.2614C>T | p.Arg872Ter | P |
| 10 | PKD2 | c.1249C>T | p.Arg417Ter | P |
| 11 | PKD2 | c.2419C>T | p.Arg807Ter | P |
| 12 | PKD2 | c.964C>T | p.Arg322Trp | P |
| 13 | PKD2 | c.595+3A>T | - | P |
| 14 | PKD2 | c.1244T>G | p.Leu415Arg | P |
| 15 | PKD2 | c.958C>T | p.Arg320Ter | P |
| 16 | PKD2 | c.1142G>T | p.Gly381Val | LP |
| 17 | PKD2 | c.1244T>G | p.Leu415Arg | LP |
| 18 | PKD2 | c.1395T>A | p.Tyr465Ter | LP |
| 19 | PKD2 | c.2358delG | p.Glu787ArgfsTer14 | P |
| 20 | PKD2 | c.2614C>T | p.Arg872Ter | P |
| 21 | PKD2 | c.916C>T | p.Arg306Ter | p |
| 22 | PKD2 | c.637C>T | p.Arg213Ter | p |
| 23 | PKD2 | c.974G>A | p.Arg325Gln | LP |
| 24 | PKD2 | c.2614C>T | p.Arg872Ter | P |
| 25 | PKD2 | c.2614C>T | p.Arg872Ter | P |
| 26 | PKD2 | c.1061A>G | p.Asp354Gly | LP |
| 27 | PKD2 | c.1061A>G | p.Asp354Gly | LP |
| 28 | PKD2 | c.916C>T | p.Arg306Ter | P |
| 29 | PKD2 | c.2117delA | p.Lys706ArgfsTer10 | LP |
| 30 | PKD2 | c.1319+1G>A | - | P |
| 31 | PKD2 | c.709+1G>A | - | P |
| 32 | PKD2 | c.2419C>T | p.Arg807Ter | P |
| 33 | PKD2 | c.2117delA | p.Lys706ArgfsTer10 | LP |
| 34 | PKD2 | c.1395T>A | p.Tyr465Ter | LP |
| 35 | PKD2 | c.2117delA | p.Lys706ArgfsTer10 | LP |
| 36 | PKD2 | c.714delC | p.Tyr239ThrfsTer3 | P |
| 37 | PKD2 | c.2614C>T | p.Arg872* | p |
| 38 | PKD2 | c.2019+5G>A | - | LP |
| 39 | PKD2 | c.2019+5G>A | - | LP |
| 40 | PKD2 | c.2614C>T | p.Arg872Ter | P |
| 41 | PKD2 | c.964C>T | p.Arg322Trp | P |
| 42 | PKD2 | c.2398A>C | p.Met800Leu | lp |
| 43 | PKD2 | c.1047_1050dup | p.Ser351CysfsTer3 | LP |
| 44 | PKD2 | c.1679_1689del | p.Asn560SerfsTer9 | LP |
| 45 | PKD2 | c.2117delA | p.Lys706ArgfsTer10 | LP |
| 46 | PKD2 | c.2398A>C | p.Met800Leu | LP |
| 47 | PKD2 | MLPA del PKD2 | - | P |
| 48 | PKD2 | MLPA del PKD2 | - | P |

|  | **Gene** | **cDNA change** | **Protein variant** | **ACMG Classification** |
| --- | --- | --- | --- | --- |
| 1 | PRKCSH | c.1269C>G | p.Tyr423Ter | P |
| 2 | LRP5 | c.1481G>A | p.Arg494Gln | P |
| 3 | HNF1B | c.1462C>T | p.Gln488Ter | P |
| 4 | UMOD | c.767G>A | p.Cys256Tyr | LP |
| 5 | UMOD | c.767G>A | p.Cys256Tyr | LP |
| 6 | UMOD | c.604T>C | p.Trp202Arg | LP |
| 7 | PRKCSH | c.1269C>G | p.Tyr423Ter | P |
| 8 | PRKCSH | c.1269C>G | p.Tyr423Ter | P |
| 9 | MAPKBP1 | c.2253del | p.Gly758Aspfs*74 | LP |
| 10 | HNF1B | c.1462C>T | p.Gln488Ter | P |
| 11 | VHL | c.217C>T | p.Gln73Ter | P |
| 12 | TSC2 | c.1832G>A | p.Arg611Gln | P |

|  | **Gene** | **c.DNA change** | **Protein variant** | **ACMG Classification** |
| --- | --- | --- | --- | --- |
| 1 | PKHD1 | c.3994G>A  MLPA Dup | p.Asp1332Asn  - | P/P |
| 2 | PKHD1 | c.1690C>T c.9107T>G | p.Arg564Ter p.Val3036Gly | P/LP |
| 3 | PKHD1 | c.9500T>C; c.2854G>A | p.Ile3167Thr p.Gly952Arg | P/LP |
| 4 | PKHD1 | c.107C>T; c.4870C>T | p.Thr36Met p.Arg1624Trp | P/LP |

|  | **Gene** | **DNA change** | **Protein variant** | **ACMG Classification** |
| --- | --- | --- | --- | --- |
| 1 | ATP6V1B1 | c.481G>A | p.Glu161Lys | LP/V/LB |
| 2 | COL4A3 | c.872G>A | p.Gly291Glu | LP |
| 3 | BBS12 | c.1115_1116del | p.Gly371_Phe372insTer | P |
| 4 | BBS4 | c.332+2_332+3insTT | - | P |
| 5 | PMM2 | c.713G>A | p.Arg238His | LP |
| 6 | PMM2 | c.713G>A | p.Arg238His | LP |
| 7 | PMM2 | c.713G>A | p.Arg238His | LP |
| 8 | PMM2 | c.713G>A | p.Arg238His | LP |
| 9 | COL4A4 | c.2242G>A | p.Gly748Ser | P |
| 10 | BBS4 | c.332+2_332+3insTT | - | P |
| 11 | PKHD1 | c.8321A>G | p. Asp2774Gly | LP |
| 12 | ALG9 | c.896-2A>G | - | LP |
| 13 | DZP1L | c.1138C>T | p.Gln380* | LP |
| 14 | CEP164 | c.3144del | p.Glu1049Argfs*18 | LP |
| 15 | PKHD1 | c.4870C>T | p.Arg1624Trp | P |
| 16 | TTC21B | c.3264-3C>G | - | LP |
| 17 | CEP290 | c.1987A>T | p.Lys663* | LP |
| 18 | PKHD1 | c.8321A>G | p.Asp2774Gly | LP |
| 19 | CRB2 | c.356dup | p.His119Glnfs*163 | LP |
| 20 | PKHD1 | c.10499_10503del | p.Tyr3500* | P |
| 21 | COL4a4 | c.931-2A>G | - | LP |
| 22 | CEP164 | c.3055C>T | p.Gln1019Ter | P |
| 23 | PMM2 | c.713G>A | p.Arg238His | LP |
| 24 | PMM3 | c.713G>A | p.Arg238His | LP |
| 25 | PMM4 | c.713G>A | p.Arg238His | LP |
| 26 | DZIP1L | c.166C>T | p.Gln56Ter | P |
| 27 | Col4a4 | c.1580del | p.Gly527ValfsTer12 | P |
| 28 | Cep290 | c.4723A>T | p.Lys1575Ter | P |
| 29 | CEP164 | c.45 C>T | p.Arg151Ter | P |
| 30 | TTC21B | c.3264-3C>G | - | P |
| 31 | CEP290 | c.1987A>T | p.Lys663* | P |
| 32 | PKHD1 | c.431C>T | p.Pro144Leu | P |
| 33 | PKHD1 | c.737T>C | p.Ile246Thr | P |
| 34 | PKHD1 | c.431C>T | p.Pro144Leu | LP |
| 35 | PKHD1 | c.8321A>G | p. Asp2774Gly | P |
| 36 | ALG9 | c.896-2A>G | - | P |
| 37 | DZP1L | c.1138C>T | p.Gln380* | P |
| 38 | CEP164 | c.3144del | p.Glu1049Argfs*18 | P |
