# Supplementary material
Source: Research Square preprint supplement (doi:10.21203/rs.3.rs-9424412/v1)
Supplement: Supplementary file 2 [file 494a86a3fe02c71fc410568c.docx]

**Appendix A1.** GnomAD allele frequencies overall and across major ancestral groups

| **Genetic Ancestry Group** | **Allele Frequency** |
| --- | --- |
| Admixed American | 0.0001333 |
| African/African American | 0.00009343 |
| East Asian | 0.000 |
| European (Finnish) | 0.00003134 |
| South Asian | 0.0002855 |
| Remaining | 0.0006403 |
| Total | 0.0004022 |
